# Supplementary material for: Ferroptosis and Apoptosis Are Involved in the Formation of L-Selenomethionine-Induced Ocular Defects in Zebrafish Embryos
Source: MDPI journal article supplement (doi:10.3390/ijms23094783), 2022-04-26
Supplement: s1 [file s1]

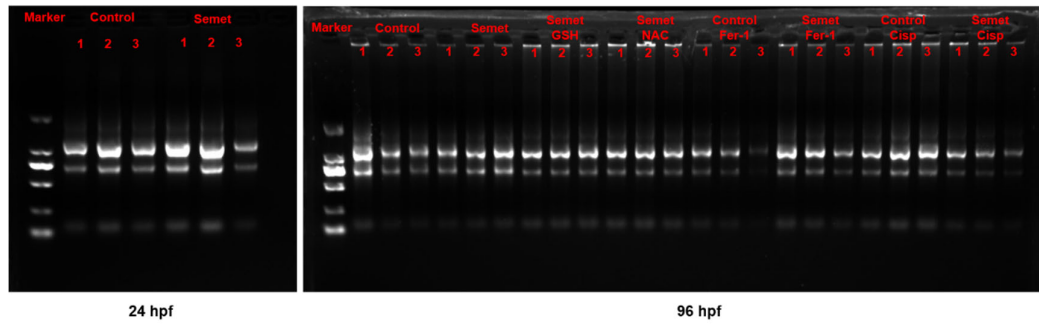

**Figure S1.** Agarose gel electrophoresis of RNA used in this study.

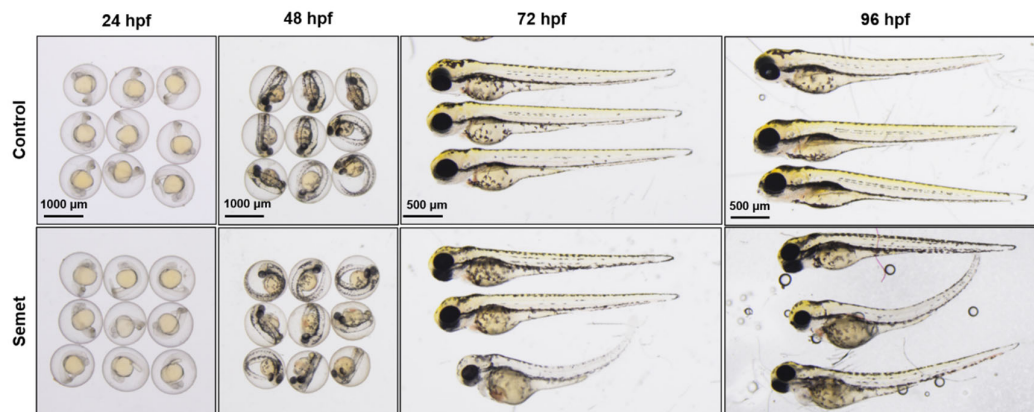

**Figure S2.** Phenotypes of representative selenium-stressed embryos at 24, 48, 72 and 96 hpf.

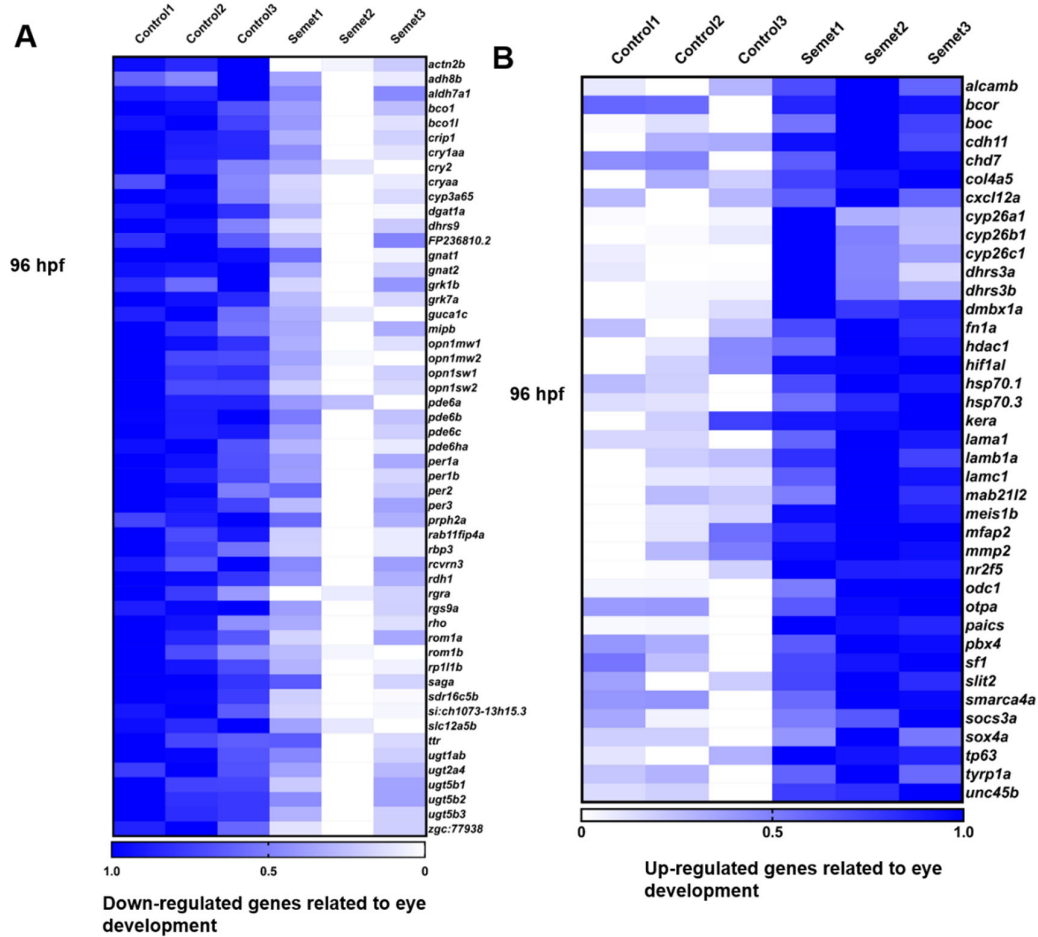

**Figure S3.** Heatmaps of genes related to eye development (A, down-regulation; B, upregulation) based on RNA-seq data at 96 hpf.

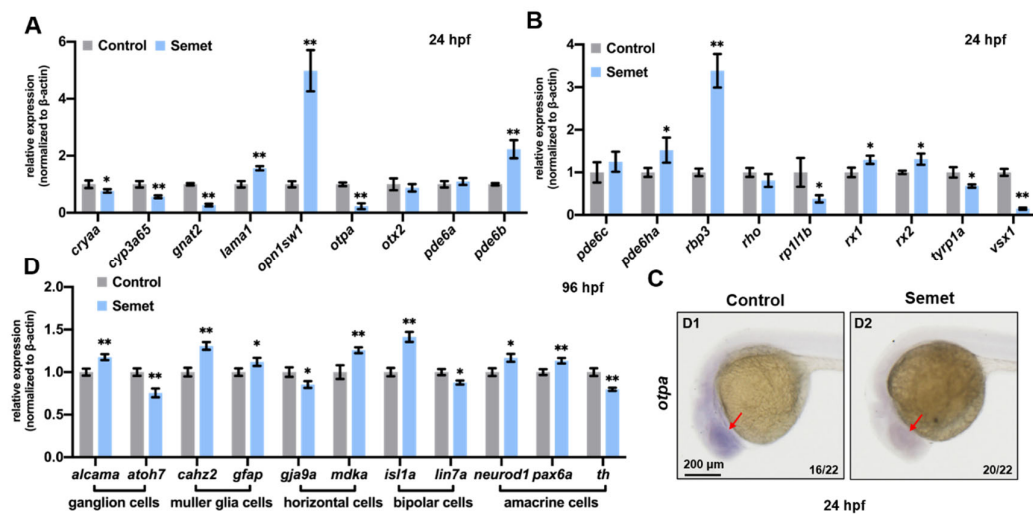

**Figure S4.** Expression of ocular marker genes in selenium-treated embryos. (A, B) The expression of ocular marker genes in selenium-treated embryos at 24 hpf detected by qRT-PCR. (C) The expression of

ganglion, muller glia, horizontal, bipolar and amacrine cell marker genes at 96 hpf. (D) WISH data of *otpa* (D3-D4) in control and selenium-treated embryos at 24 hpf.

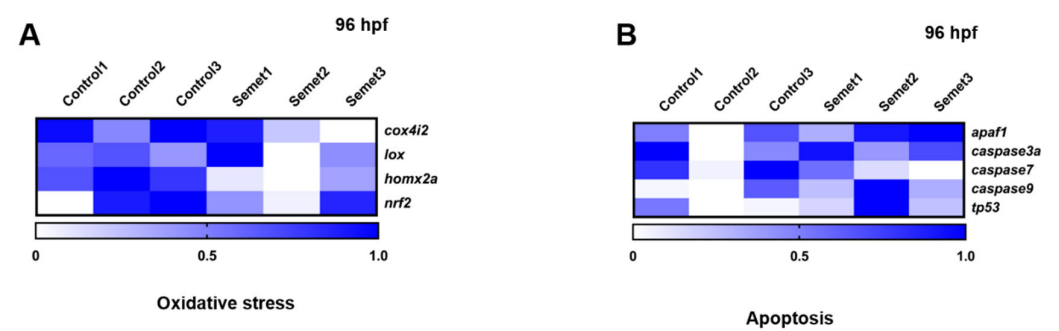

**Figure S5.** Heatmaps of genes related to oxidative stress (A) and apoptosis (B) based on RNA-seq data at 96 hpf.

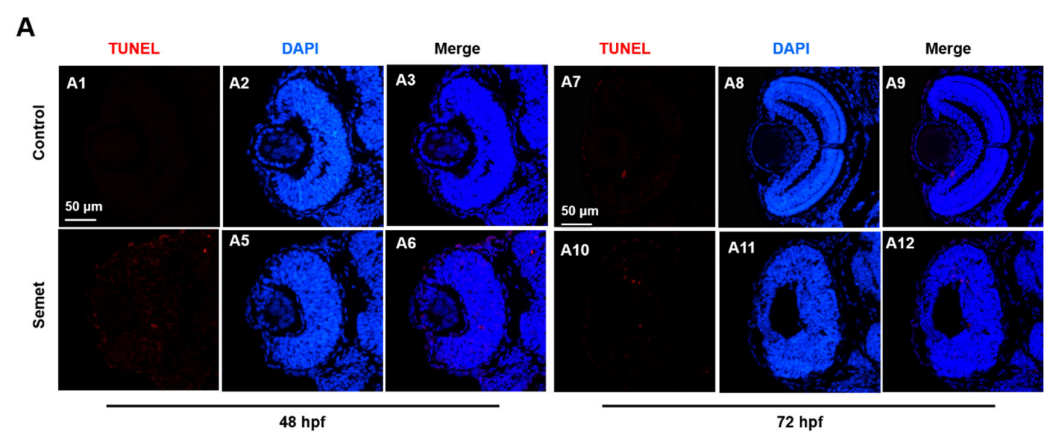

**Figure S6.** Cell apoptosis detected by TUNEL assay in control and selenium-treated embryos at 48 hpf and 72 hpf.

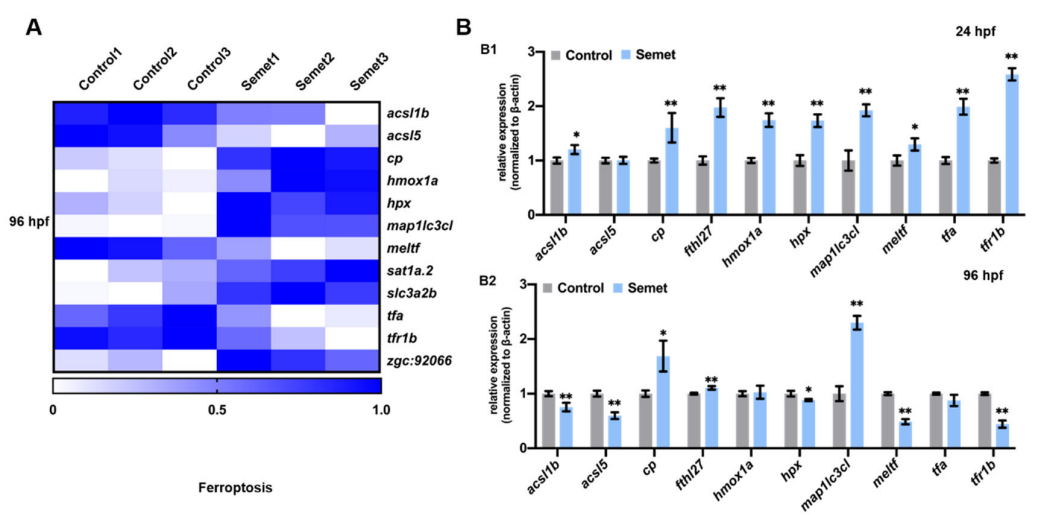

**Figure S7.** Expression of ferroptosis marker genes in selenium-treated embryos. **(A)** DEGs of ferroptosis detected by RNA-seq in selenium-treated embryos at 96 hpf. **(B)** The expression of ferroptosis marker genes in selenium-treated embryos at 24 hpf **(B1)** and 96 hpf **(B2)** detected by qRT-PCR.
